# Supplementary material for: Oral supplementation with Sucrosomial® Iron improves the iron status of preterm piglets delivered by cesarean section
Source: Royal Society of Chemistry journal article supplement (doi:10.1039/d4fo04806g), 2025-01-01

# Hepatic ferritin light chain (19 kDa)

TC: full-term piglets without iron supplementation; TS: full-term piglets supplemented with Sucrosomial® iron; PC: preterm piglets without iron supplementation; PS: preterm piglets supplemented with Sucrosomial® iron; *PF: preterm piglets supplemented with FeSO4 (We did not use this data in the article)*

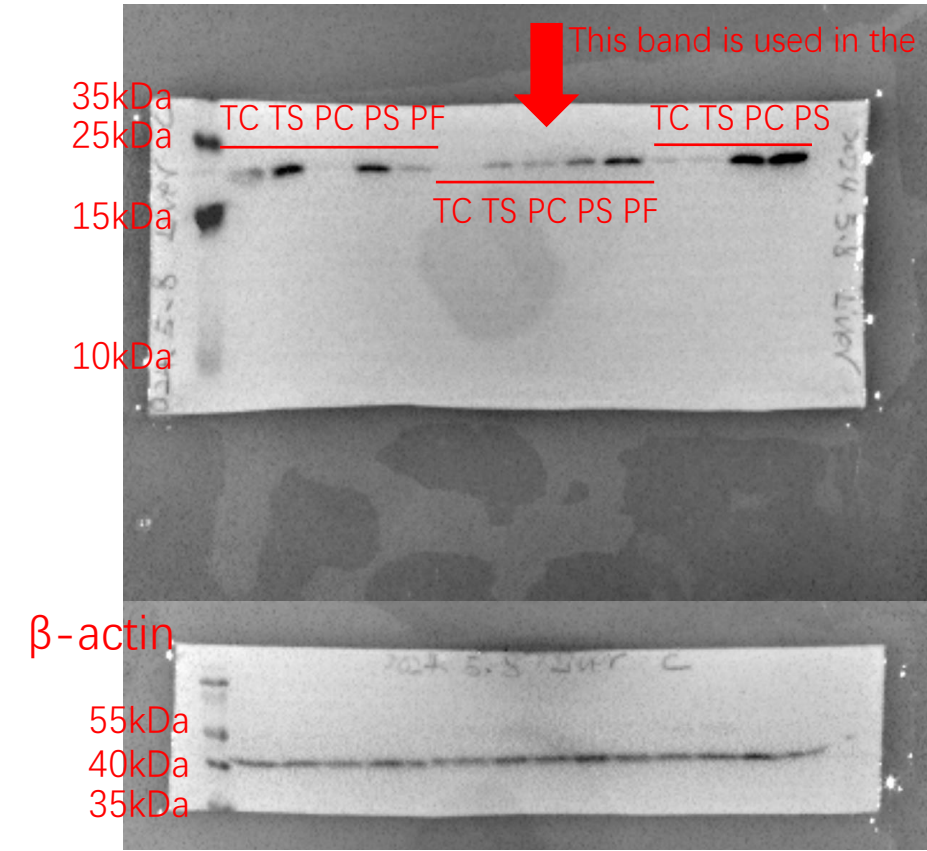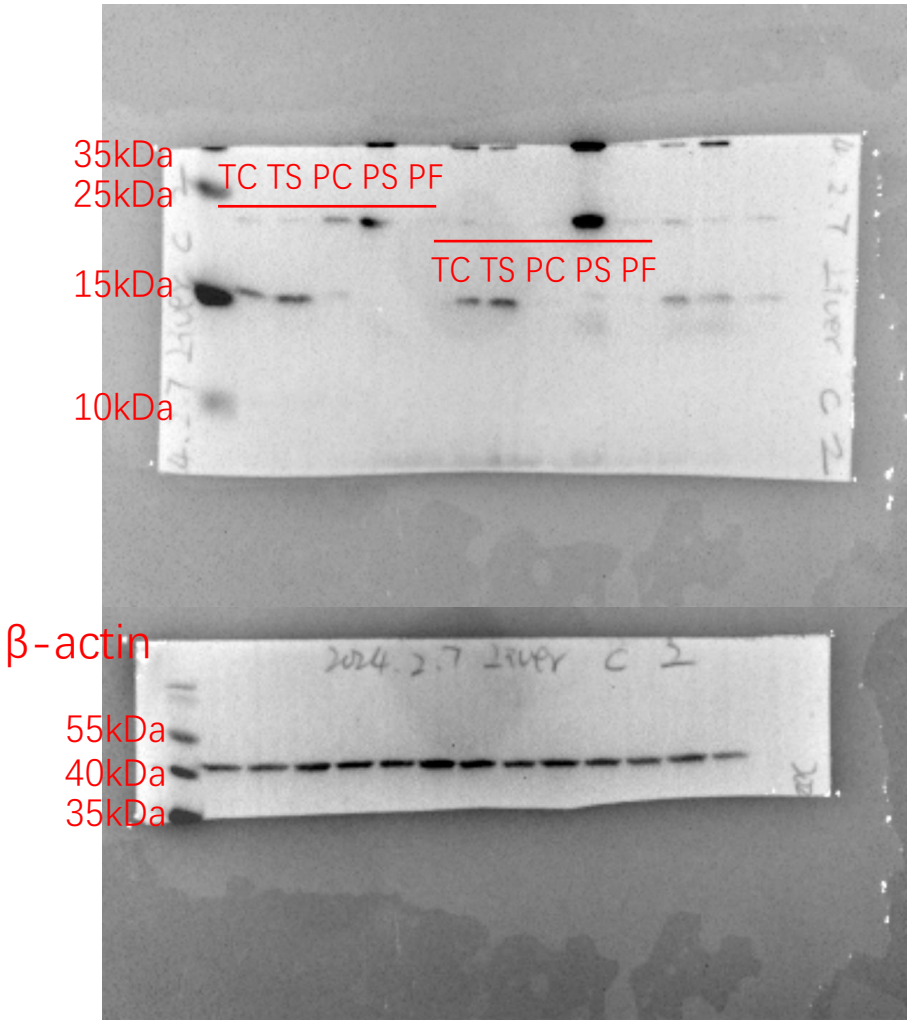

# Hepatic ferritin heavy chain (21 kDa)

TC: full-term piglets without iron supplementation; TS: full-term piglets supplemented with Sucrosomial® iron; PC: preterm piglets without iron supplementation; PS: preterm piglets supplemented with Sucrosomial® iron; PF: *preterm piglets supplemented with FeSO4 (We did not use this data in the article)*

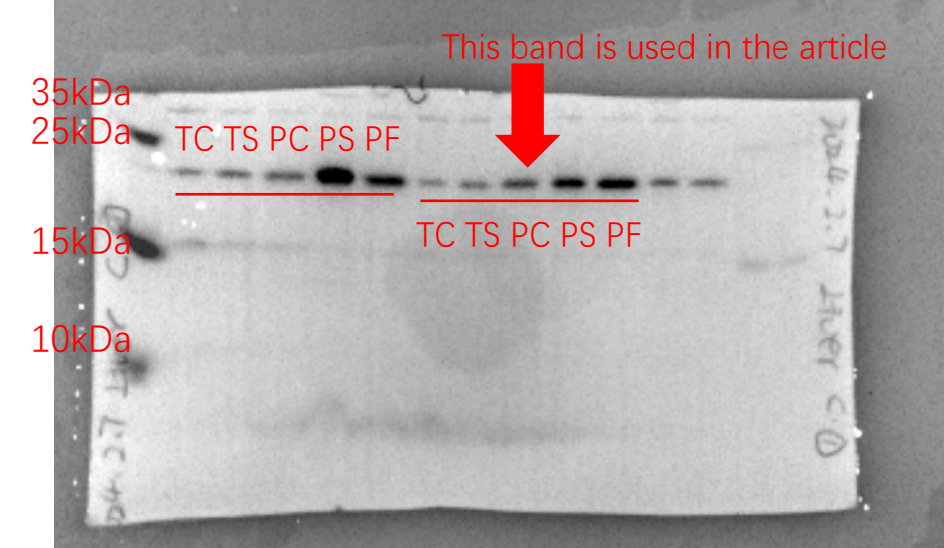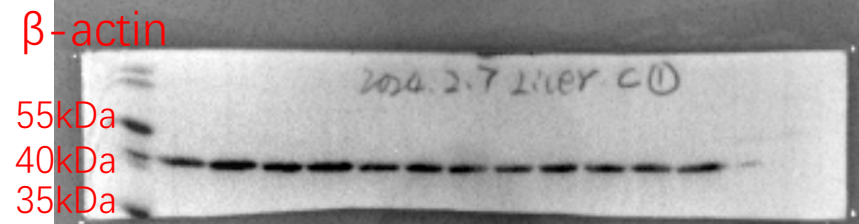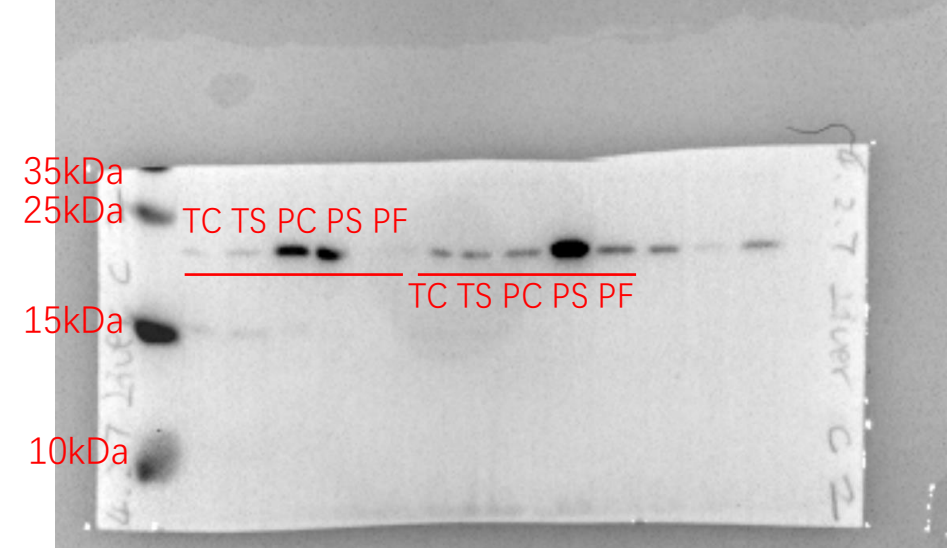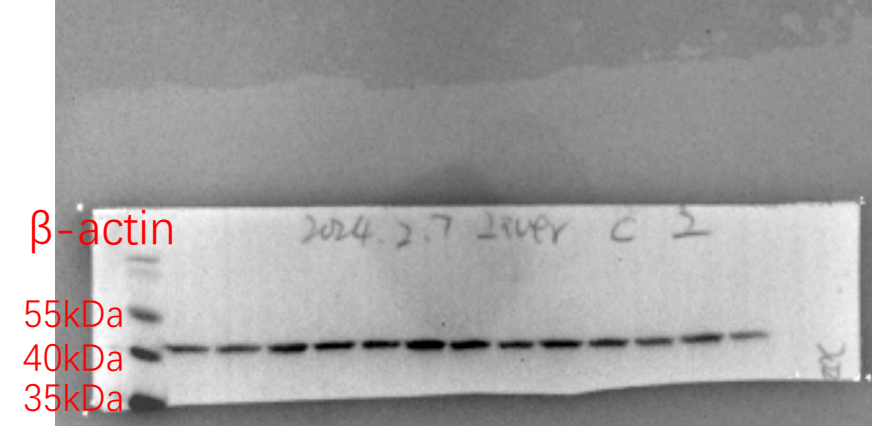

# Hepatic Ferroportin (62 kDa)

TC: full-term piglets without iron supplementation; TS: full-term piglets supplemented with Sucrosomial® iron; PC: preterm piglets without iron supplementation; PS: preterm piglets supplemented with Sucrosomial® iron; *PF: preterm piglets supplemented with FeSO4 (We did not use this data in the article)*

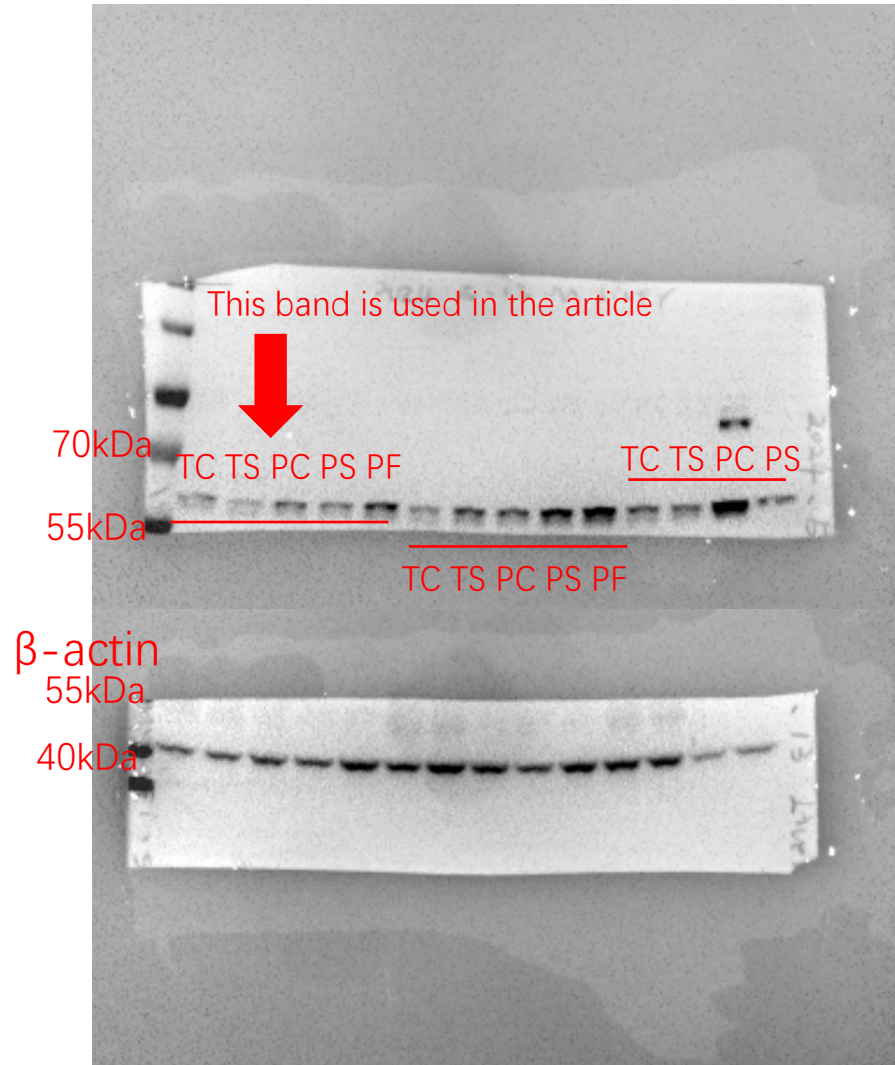



# Splenic ferritin light chain (19 kDa)

TC: full-term piglets without iron supplementation; TS: full-term piglets supplemented with Sucrosomial® iron; PC: preterm piglets without iron supplementation; PS: preterm piglets supplemented with Sucrosomial® iron; *PF: preterm piglets supplemented with FeSO4 (We did not use this data in the article)*

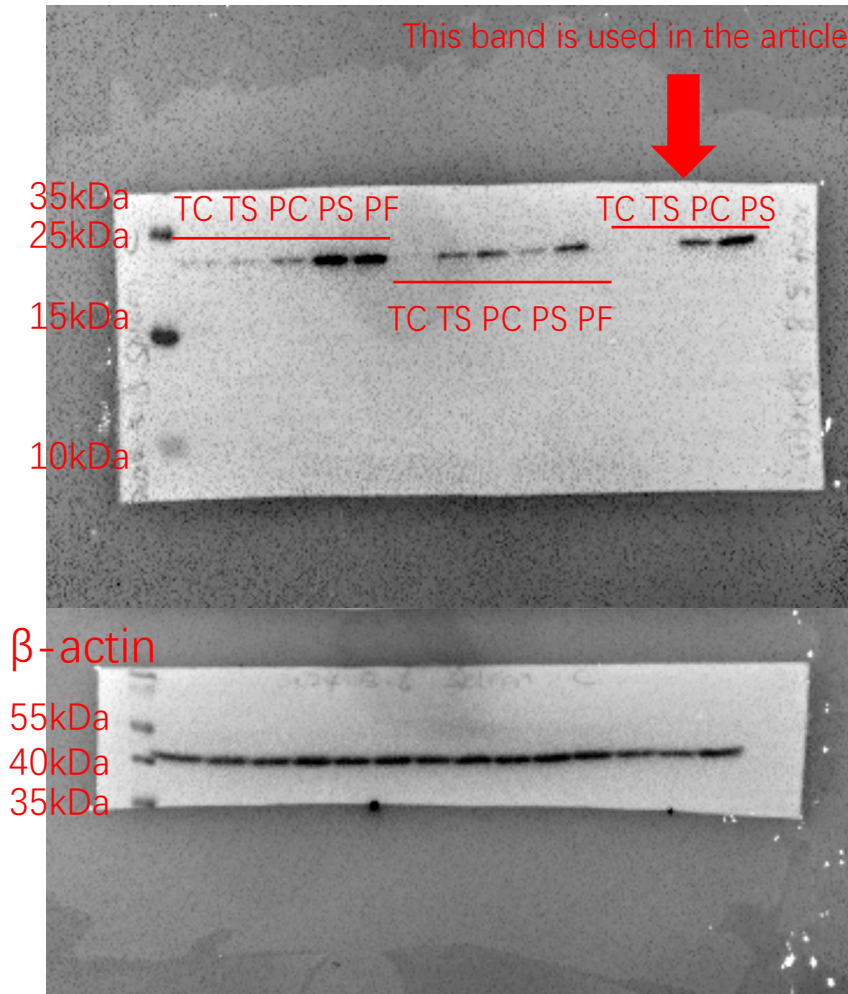

# Splenic ferritin heavy chain (21 kDa)

TC: full-term piglets without iron supplementation; TS: full-term piglets supplemented with Sucrosomial® iron; PC: preterm piglets without iron supplementation; PS: preterm piglets supplemented with Sucrosomial® iron; *PF: preterm piglets supplemented with FeSO4 (We did not use this data in the article)*

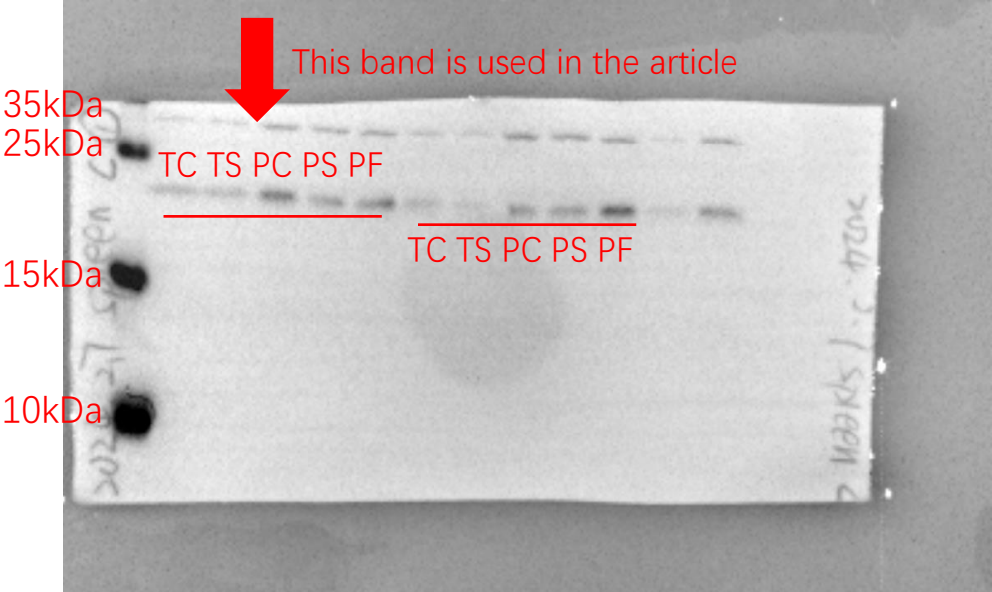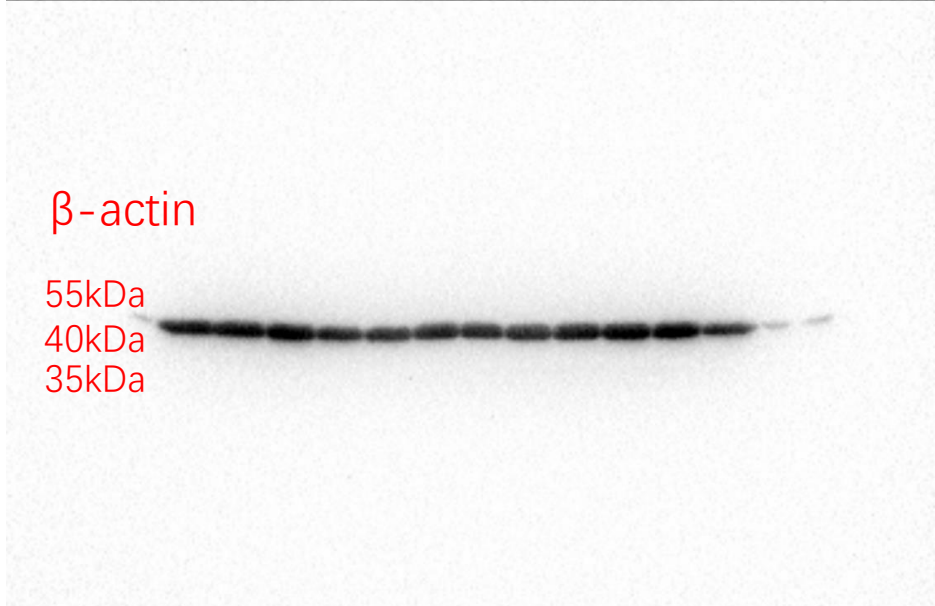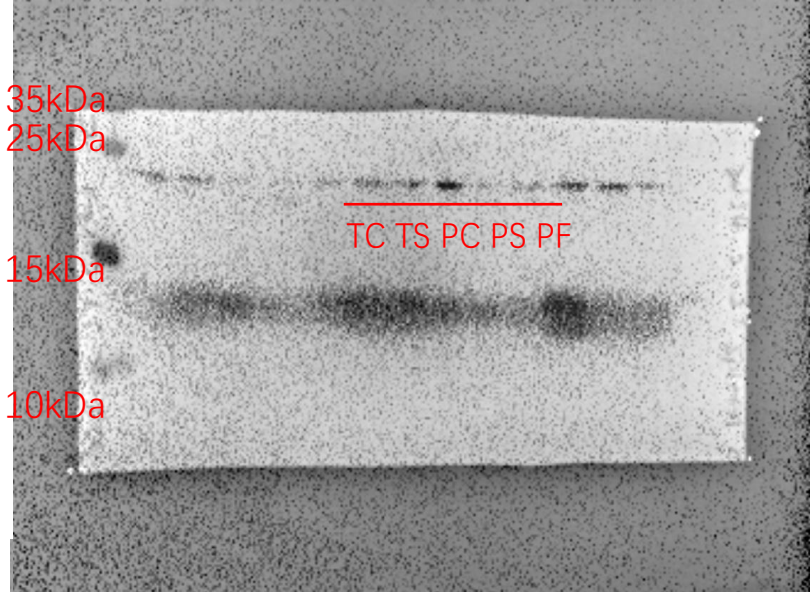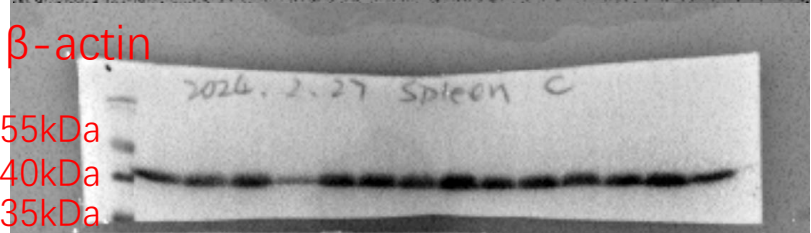

# Splenic Ferroportin (62 kDa)

TC: full-term piglets without iron supplementation; TS: full-term piglets supplemented with Sucrosomial® iron; PC: preterm piglets without iron supplementation; PS: preterm piglets supplemented with Sucrosomial® iron; *PF: preterm piglets supplemented with FeSO4 (We did not use this data in the article)*

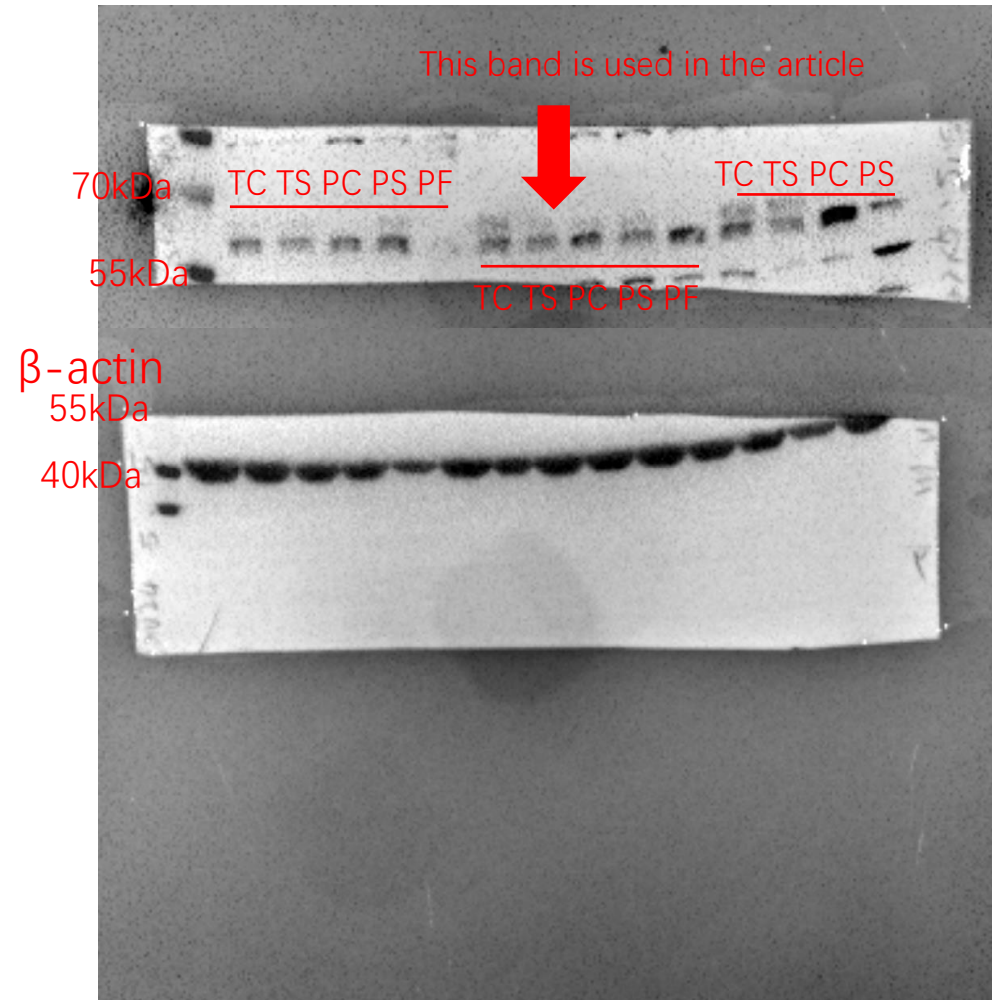

Supplement: d4fo04806g1.pdf [file d4fo04806g1.pdf]
